# Supplementary material
Source: HighWire-hosted journal article supplement (https://www.ajnr.org/highwire/filestream/52624/field_highwire_adjunct_files/0/zj400815p.pdf)
Supplement: zj400815p.pdf [file zj400815p.pdf]

**On-line Table 1: ICV means and SDs in milliliters by the various estimation methods**

| Method               | All (n = 30) | Males (n = 15) | Females (n = 15) |
|----------------------|--------------|----------------|------------------|
| Manual               | 1598 (185)   | 1723 (125)     | 1473 (147)       |
| FreeSurfer           | 1487 (185)   | 1620 (134)     | 1354 (124)       |
| Optimized FreeSurfer | 1598 (177)   | 1725 (128)     | 1471 (119)       |
| RBM                  | 1607 (178)   | 1733 (125)     | 1482 (128)       |
| RBM multi            | 1596 (178)   | 1722 (121)     | 1469 (128)       |
| ARBM                 | 1598 (177)   | 1722 (124)     | 1475 (129)       |
| ARBM multi           | 1568 (174)   | 1692 (119)     | 1444 (127)       |

**On-line Table 2: Pearson correlation between brain volumes and ICV estimates for the whole HUNT dataset**

| Brain Volumes           | FreeSurfer <sup>a</sup> | ARBM | ARBM Multi |
|-------------------------|-------------------------|------|------------|
| Cerebral white matter   | 0.86                    | 0.85 | 0.87       |
| Cerebral cortex         | 0.79                    | 0.79 | 0.81       |
| Cerebellum white matter | 0.64                    | 0.63 | 0.64       |
| Cerebellum cortex       | 0.66                    | 0.66 | 0.66       |
| Thalamus proper         | 0.72                    | 0.70 | 0.71       |
| Caudate                 | 0.58                    | 0.55 | 0.55       |
| Putamen                 | 0.55                    | 0.53 | 0.54       |
| Hippocampus             | 0.55                    | 0.54 | 0.56       |
| Pallidum                | 0.51                    | 0.46 | 0.47       |
| Amygdala                | 0.55                    | 0.56 | 0.56       |
| Nucleus accumbens       | 0.43                    | 0.44 | 0.45       |

<sup>a</sup> The FreeSurfer and FreeSurfer Opt correlations are identical because these 2 measurements are linearly related.

**On-line Table 3: Accuracy of ICV estimates by the original RBM method that used the unified segmentation algorithm in SPM and the modified RBM method that used the "new segment" algorithm in SPM compared with manual delineation**

|                          | Original RBM (thr = 0.9) <sup>a</sup> | Original RBM (thr = 0.69) <sup>b</sup> | RBM (thr = 0.9) <sup>a</sup> | RBM (thr = 0.34) <sup>b</sup> | ARBM          |
|--------------------------|---------------------------------------|----------------------------------------|------------------------------|-------------------------------|---------------|
| Volume differences (mL)  |                                       |                                        |                              |                               |               |
| Mean (SD)                | -41.77 (304.52)                       | -143.02 (315.86)                       | 246.14 (46.12)               | -9.17 (42.34)                 | -0.07 (41.64) |
| Absolute mean (SD)       | 219.34 (211.59)                       | 198.89 (282.85)                        | 246.14 (46.12)               | 34.38 (25.63)                 | 34.57 (22.31) |
| Volume differences (%)   |                                       |                                        |                              |                               |               |
| DIFF (SD)                | -1.9 (17.3)                           | -7.9 (17.1)                            | 16.6 (2.2)                   | -0.6 (2.7)                    | -0.1 (2.6)    |
| ADIFF (SD)               | 12.9 (11.3)                           | 11.3 (15.0)                            | 16.6 (2.2)                   | 2.2 (1.6)                     | 2.2 (1.4)     |
| Dice overlap (mean) (SD) | 0.90 (0.10)                           | 0.90 (0.10)                            | 0.95 (0.01)                  | 0.96 (0.01)                   | 0.96 (0.01)   |

**Note:**—DIFF indicates volume difference; ADIFF, absolute volume difference; thr, threshold.

<sup>a</sup> With threshold = 0.9 as suggested in the original article by Keihaninejad et al.<sup>4</sup>

<sup>b</sup> With a least-squares optimized threshold.
